# Supplementary material for: Bulk heterojunction organic photovoltaic cells based on D–A type BODIPY small molecules as non-fullerene acceptors
Source: Royal Society of Chemistry journal article supplement (doi:10.1039/d2tc02497g), 2022-01-01
Supplement: d2tc02497g1.pdf [file d2tc02497g1.pdf]

## Supporting information

### Bulk heterojunction organic photovoltaic cells based on D-A type BODIPY small molecules as nonfullerene acceptor

Ting Wei,<sup>a</sup> Hemraj Dahiya<sup>b</sup>, Xu Liang,<sup>c</sup> Weihua Zhu<sup>c</sup>, Sarvesh K. Pandey<sup>d</sup>, Manish Kumar Singh<sup>b</sup>, Haijun Xu <sup>a, e, \*</sup> Ganesh D. Sharma<sup>b, f</sup>

<sup>a</sup>Jiangsu Co-innovation Center of Efficient Processing and Utilization of Forest Resources, College of Chemical Engineering, Nanjing Forestry University, Nanjing 210037, P. R. China.

<sup>b</sup>Department of Physics, The LNM Institute of Information Technology, Jamdoli, Jaipur (Raj.) 302017, India

<sup>c</sup>School of Chemistry and Chemical Engineering, Jiangsu University, Zhenjiang 212013, P. R. China.

<sup>d</sup>Department of Inorganic and Physical Chemistry (IPC), Indian Institute of Science, Bengaluru (Karnataka) 560012, India

<sup>e</sup>School of Chemistry and Chemical Engineering, Henan Normal University, Xinxiang 453007, P. R. China

<sup>f</sup>Department of Electronics and Communication Engineering, The LNM Institute of Information Technology, Jamdoli, Jaipur (Raj.) 302017, India

#### Table of contents

|            |                                                                                                                                                                      |    |
|------------|----------------------------------------------------------------------------------------------------------------------------------------------------------------------|----|
| Figure S1  | <sup>1</sup> H-NMR spectrum of <b>CF<sub>3</sub>-BDP</b> in CDCl <sub>3</sub>                                                                                        | 5  |
| Figure S2  | <sup>1</sup> H-NMR spectrum of 9-butyl-9H-carbazole-3-carbaldehyde in CDCl <sub>3</sub>                                                                              | 6  |
| Figure S3  | <sup>1</sup> H-NMR spectrum of <b>CF<sub>3</sub>-BDP-TPA</b> in DMSO-d <sub>6</sub>                                                                                  | 7  |
| Figure S4  | <sup>13</sup> C-NMR spectrum of <b>CF<sub>3</sub>-BDP-TPA</b> in CDCl <sub>3</sub>                                                                                   | 8  |
| Figure S5  | HRMS (ESI) spectrum of <b>CF<sub>3</sub>-BDP-TPA</b>                                                                                                                 | 9  |
| Figure S6  | <sup>1</sup> H-NMR spectrum of <b>CF<sub>3</sub>-BDP-Cz</b> in CDCl <sub>3</sub>                                                                                     | 10 |
| Figure S7  | <sup>13</sup> C-NMR spectrum of <b>CF<sub>3</sub>-BDP-Cz</b> in CDCl <sub>3</sub>                                                                                    | 11 |
| Figure S8  | HRMS (ESI) spectrum of <b>CF<sub>3</sub>-BDP-Cz</b>                                                                                                                  | 12 |
| Figure S9  | (a) Normalized electronic absorption spectra and (b) PL spectra of <b>CF<sub>3</sub>-BDP-TPA</b> and <b>CF<sub>3</sub>-BDP-Cz</b> in CH <sub>2</sub> Cl <sub>2</sub> | 13 |
| Figure S10 | QTAIM Based Molecular Graph (a) <b>CF<sub>3</sub>-BDP-TPA</b> and (b) <b>CF<sub>3</sub>-BDP-Cz</b>                                                                   | 13 |
| Figure S11 | RDG Scattered 2D Plot and 3D iso-surface Maps                                                                                                                        | 15 |
| Figure S12 | XRD patterns of pristine films                                                                                                                                       | 16 |
| Table S1   | Some useful and chosen extra QTAIM based topological                                                                                                                 | 13 |

## General

All chemicals and solvents were of analytical reagent grade and used directly as received unless otherwise noted.  $^1\text{H}$ -NMR /  $^{13}\text{C}$ -NMR spectra were recorded on a Bruker AVANCE III 400M/600 MHz spectrometer. Chemical shifts for  $^1\text{H}$  NMR spectra were expressed in parts per million (ppm) relative to  $\text{CDCl}_3$  ( $\delta = 7.26$  ppm) or  $\text{DMSO-d}_6$  ( $\delta = 2.50$  ppm) as the internal standard. UV-Vis spectra were recorded on Shimadzu UV-2600 spectrophotometer at ambient temperature with a 1 cm quartz cell. The high-resolution mass spectra (HRMS) data was performed on a LTQ Orbitrap XL spectrometer equipped with an electrospray ionization (ESI) source. Cyclic voltammetry was performed with a three-electrode-compartment cell in  $\text{CH}_2\text{Cl}_2$  solutions with 0.1 M  $[\text{n-Bu}_4\text{N}](\text{ClO}_4)$  as supporting electrolyte using CHI-730D electrochemistry workstation. A glassy carbon electrode of diameter 3 mm was used as the working electrode while platinum wire and  $\text{Fc}/\text{Fc}^+$  electrodes were used as the counter and reference electrodes respectively.

**Synthesis of  $\text{CF}_3\text{-BDP}$ .** In a 100 mL three-necked flask, 2, 4-dimethylpyrrole (1.5 mL, 14.6 mmol) was dissolved in  $\text{CH}_2\text{Cl}_2$  (30 mL) under an argon atmosphere.  $\text{PhSiCl}_3$  (1.2 mL, 7.0 mmol) was added into the reaction system and stirred at room temperature for 10 min, then adding triethylamine and boron trifluoride ether in an ice bath and stir for 3 h. The mixture was extracted with  $\text{CH}_2\text{Cl}_2$  and washed water, and the organic layer was dried over anhydrous  $\text{Na}_2\text{SO}_4$ . The organic solvent was evaporated on a rotary evaporator under reduced pressure. The resulting residue was purified by silica gel column chromatography using  $\text{CH}_2\text{Cl}_2$ - petroleum ether ( $V_1:V_2 = 1:1$ ) as the eluent to afford the desired compound  **$\text{CF}_3\text{-BDP}$**  (168 mg, 8%).  $^1\text{H}$ -NMR (600 MHz,  $\text{CDCl}_3$ , ppm):  $\delta$  2.54 (s, 6H), 2.31-2.29 (m, 6H), 6.15 (s, 2H).

**Synthesis of 9-butyl-9H-carbazole-3-carbaldehyde.** Carbazole (1.67 g, 10 mmol), bromobutane (1.09 g, 12.5 mmol) and NaOH (5 g, 125 mmol) were dissolved in DMSO (30 mL) at room temperature for 6 h. Then the mixture was poured into ice water, extracted with ether, and the organic layer was dried over anhydrous  $\text{Na}_2\text{SO}_4$ . The organic solvent was evaporated on a rotary evaporator under reduced pressure to

afford **9-butyl-9H-carbazole** (1.93 g, 86%). After that, in a single 50 mL flask, POCl<sub>3</sub> (3.2 mL) was added drop by drop into DMF (1.5 mL) in ice bath and the reaction mixture stirred at room temperature for 2 hours. **9-butyl-9H-carbazole** (1.5 g, 6.7 mmol) was added into the reaction system. The reaction was carried out at 60°C for 12 hours. The reaction was quenched by saturated NaHCO<sub>3</sub> solution and stirred at room temperature for 1 hour. The mixture was extracted with CH<sub>2</sub>Cl<sub>2</sub> and was washed water, and the organic layer was dried over Na<sub>2</sub>SO<sub>4</sub>. The organic solvent was evaporated on a rotary evaporator under reduced pressure. The resulting residue was purified by silica gel column chromatography using CH<sub>2</sub>Cl<sub>2</sub> as the eluent to afford **9-butyl-9H-carbazole-3-carbaldehyde** (1.5 g, 89%). <sup>1</sup>H-NMR (600 MHz, CDCl<sub>3</sub>, ppm): δ 10.10 (d, J = 11.4 Hz, 1H), 8.15 (d, J = 7.8 Hz, 1H), 8.01 (dd, J = 8.4, 1.2 Hz, 1H), 7.54 (t, J = 7.8 Hz, 1H), 7.49-7.43 (m, 2H), 7.33 (t, J = 7.2 Hz, 1H), 0.96 (t, J = 7.2 Hz, 3H), 1.48-1.36 (m, 2H), 1.94-1.83 (m, 2H), 4.34 (dd, J = 14.4, 7.2 Hz, 2H), 8.68-8.45 (m, 1H).

**Synthesis of CF<sub>3</sub>-BDP-TPA.** Compound **CF<sub>3</sub>-BDP** (50 mg, 0.16 mmol), 4-(diphenylamino)benzaldehyde (109 mg, 0.4 mmol), *p*-toluenesulfonic acid (28 mg, 0.16 mmol) were dissolved in the mixture of toluene (25 mL) and piperidine (0.5 mL) were added in a 100 mL double neck round bottom flask with a dean-stark apparatus. After heating to reflux, the progress of the reaction was monitored by TLC, and the reaction stopped until compound **CF<sub>3</sub>-BDP** disappeared completely. Cooled to room temperature, the mixture was dissolved with dichloromethane, washed with brine (50 mL) and dried over anhydrous Na<sub>2</sub>SO<sub>4</sub>. The organic solvent evaporated on a rotary evaporator under reduced pressure. The resulting residue was purified by silica gel column chromatography using CH<sub>2</sub>Cl<sub>2</sub>- petroleum ether (V<sub>1</sub>:V<sub>2</sub>= 2:3) as the eluent to afford the desired compound **CF<sub>3</sub>-BDP-TPA** (56 mg, 40%). <sup>1</sup>H NMR (600 MHz, DMSO-d<sub>6</sub>, ppm) δ 7.65 (d, J = 16.2 Hz, 2H), 7.52 (d, J = 9.0 Hz, 4H), 7.39 (dd, J = 18.0, 10.8 Hz, 10H), 7.25 (s, 2H), 6.95 (d, J = 8.4 Hz, 4H), 7.17 (t, J = 7.2 Hz, 4H), 7.13 (d, J = 7.8 Hz, 8H), 2.32 (d, J = 2.4 Hz, 6H). <sup>13</sup>C NMR (100 MHz, CDCl<sub>3</sub>, ppm)

$\delta$  154.2, 149.2, 146.9, 140.5, 137.7, 133.8, 129.8, 129.4, 129.1, 129.0, 125.3, 123.9, 121.9, 120.5, 116.9, 15.9, 15.8.

**Synthesis of CF<sub>3</sub>-BDP-Cz.** Compound **CF<sub>3</sub>-BDP** (50 mg, 0.16 mmol), **9-butyl-9H-carbazole-3-carbaldehyde** (100 mg, 0.4 mmol), *p*-toluenesulfonic acid (28 mg, 0.16 mmol) were dissolved in the mixture of toluene (25 mL) and piperidine (0.5 mL) were added in a 100 mL double neck round bottom flask with a dean-stark apparatus. After heating to reflux, the progress of the reaction was monitored by TLC, and the reaction stopped until compound **CF<sub>3</sub>-BDP** disappeared completely. Cooled to room temperature, the mixture was dissolved with dichloromethane, washed with brine (50 mL) and dried over anhydrous Na<sub>2</sub>SO<sub>4</sub>. The organic solvent evaporated on a rotary evaporator under reduced pressure. The resulting residue was purified by silica gel column chromatography using CH<sub>2</sub>Cl<sub>2</sub>- petroleum ether (V<sub>1</sub>:V<sub>2</sub>= 3:7) as the eluent to afford the desired compound **CF<sub>3</sub>-BDP-Cz** (69 mg, 56%). <sup>1</sup>H NMR (600 MHz, CDCl<sub>3</sub>, ppm)  $\delta$  8.35 (s, 2H), 8.21 (d, J = 7.8 Hz, 2H), 7.86-7.82 (m, 4H), 7.57 (d, J = 16.2 Hz, 2H), 7.51 (t, J = 7.8 Hz, 2H), 7.43 (d, J = 7.2 Hz, 4H), 7.30 (t, J = 7.2 Hz, 2H), 6.88 (s, 2H), 4.33 (t, J = 7.2 Hz, 4H), 0.98 (t, J = 7.2 Hz, 6H), 1.46-1.41 (m, 4H), 1.55 (s, 6H), 1.91-1.86 (m, 4H). <sup>13</sup>C NMR (100 MHz, CDCl<sub>3</sub>, ppm)  $\delta$  154.5, 141.5, 141.0, 140.4, 139.8, 133.7, 127.8, 126.1, 125.9, 124.4, 123.4, 123.0, 121.6, 120.9, 120.8, 120.6, 119.6, 116.2, 109.2, 109.1, 43.0, 31.1, 20.6, 15.9, 13.9.

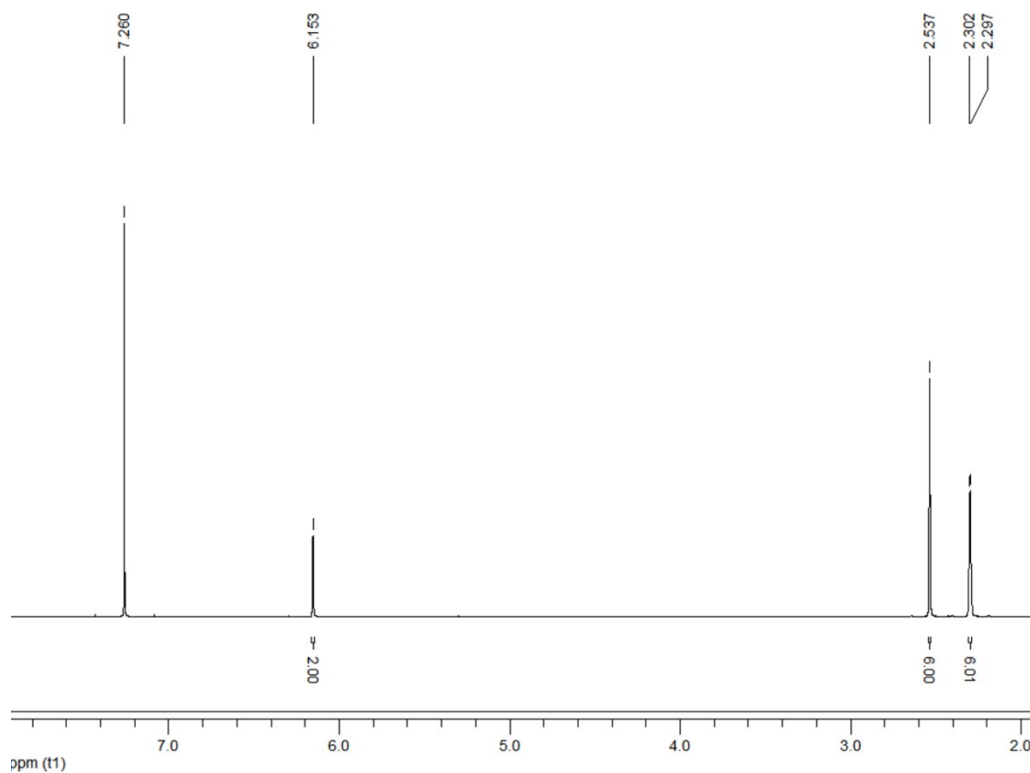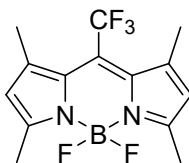

Chemical Formula:  $C_{14}H_{14}BF_5N_2$

Exact Mass: 316.12

Molecular Weight: 316.08

Figure S1.  $^1H$  NMR spectrum of compound **CF<sub>3</sub>-BDP** ( $CDCl_3$ , 600 MHz)

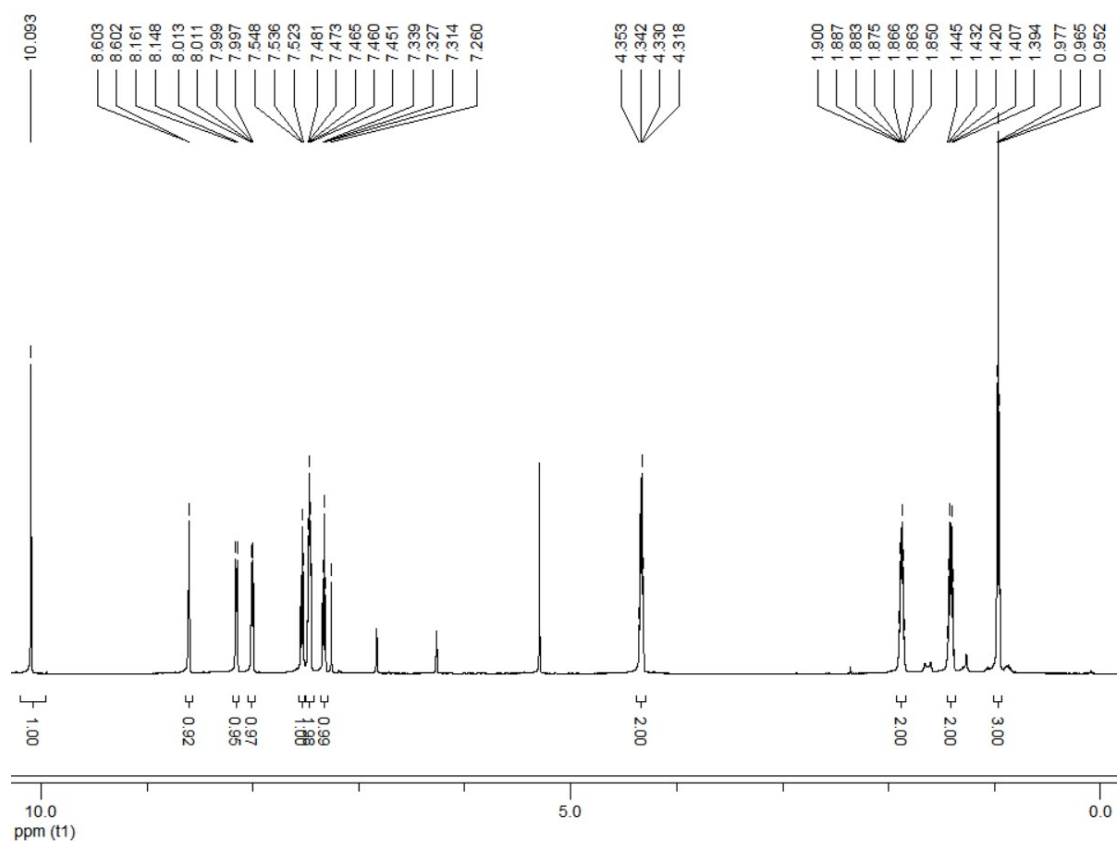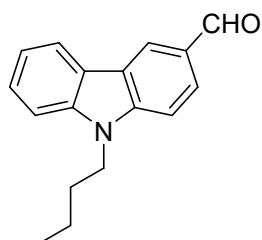

Chemical Formula: C<sub>17</sub>H<sub>17</sub>NO

Exact Mass: 251.1310

Molecular Weight: 251.3290

Figure S2. <sup>1</sup>H NMR spectrum of compound **9-butyl-9H-carbazole-3-carbaldehyde**  
(CDCl<sub>3</sub>, 600 MHz)

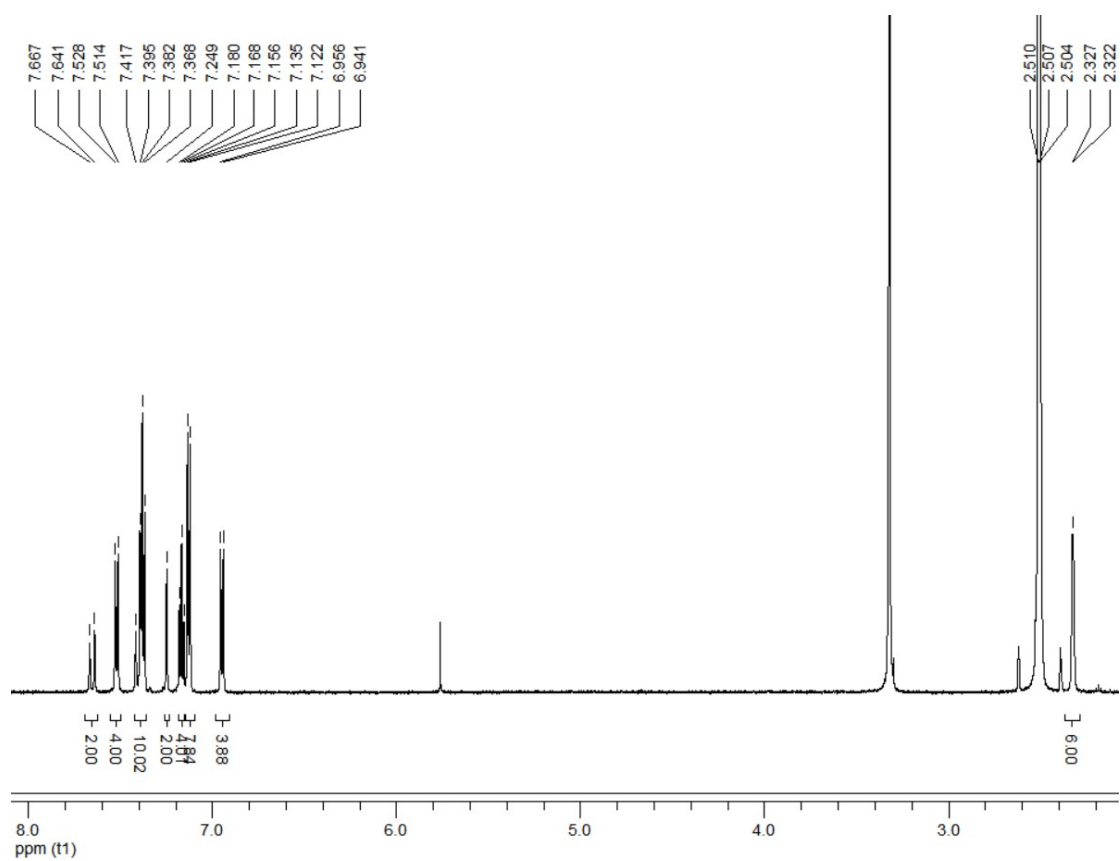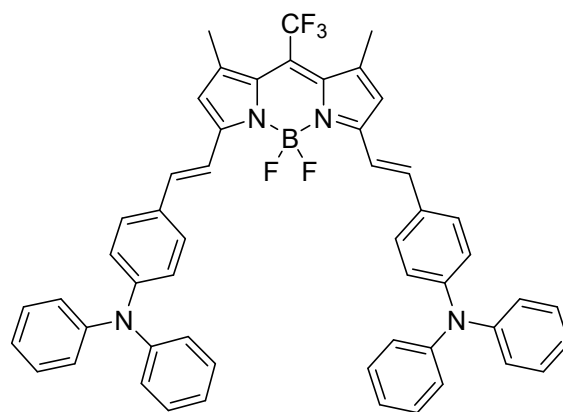

Chemical Formula: C<sub>52</sub>H<sub>40</sub>BF<sub>5</sub>N<sub>4</sub>

Exact Mass: 826.3266

Molecular Weight: 826.7220

Figure S3. <sup>1</sup>H NMR spectrum of compound CF<sub>3</sub>-BDP-TPA (DMSO-d<sub>6</sub>, 600 MHz)

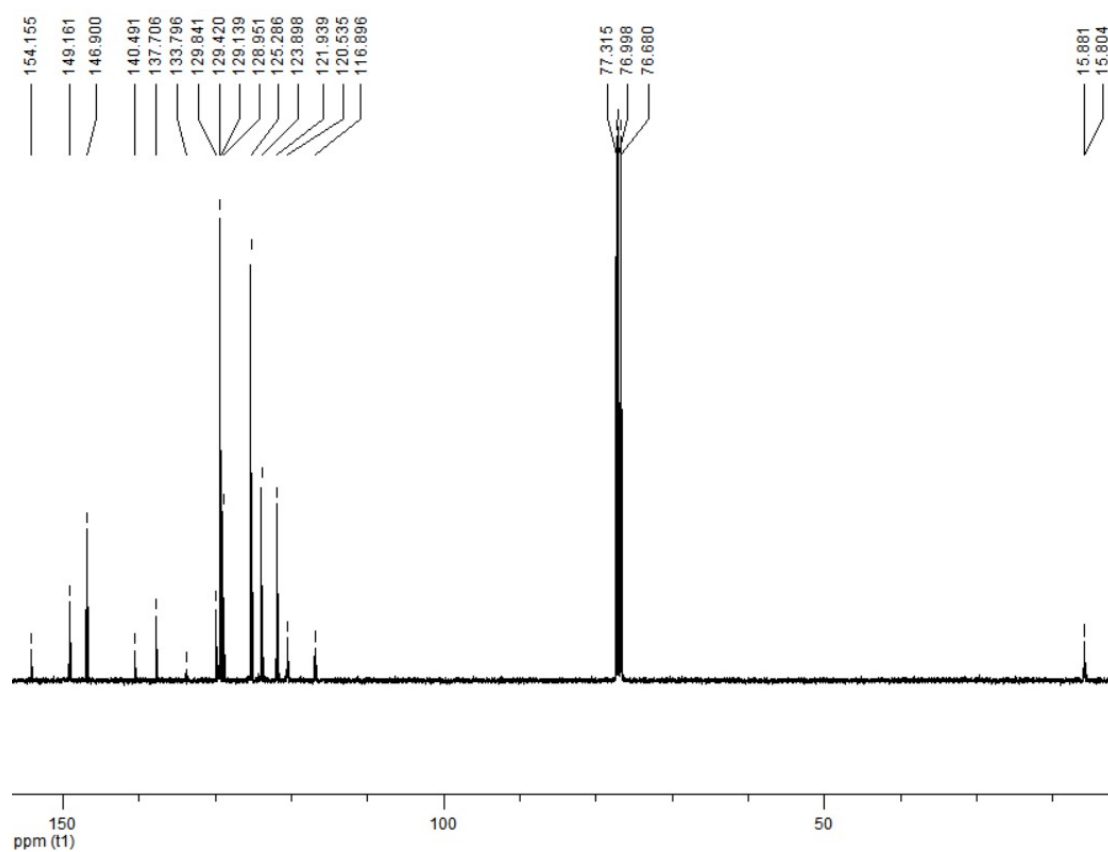

Figure S4.  $^{13}\text{C}$  NMR spectrum of compound  $\text{CF}_3\text{-BDP-TPA}$  ( $\text{CDCl}_3$ , 400 MHz)

WT-1-826\_210610121705 #72-83 RT: 0.56-0.64 AV: 12 NL: 3.52E8  
T: FTMS + c ESI Full ms [400.00-1200.00]

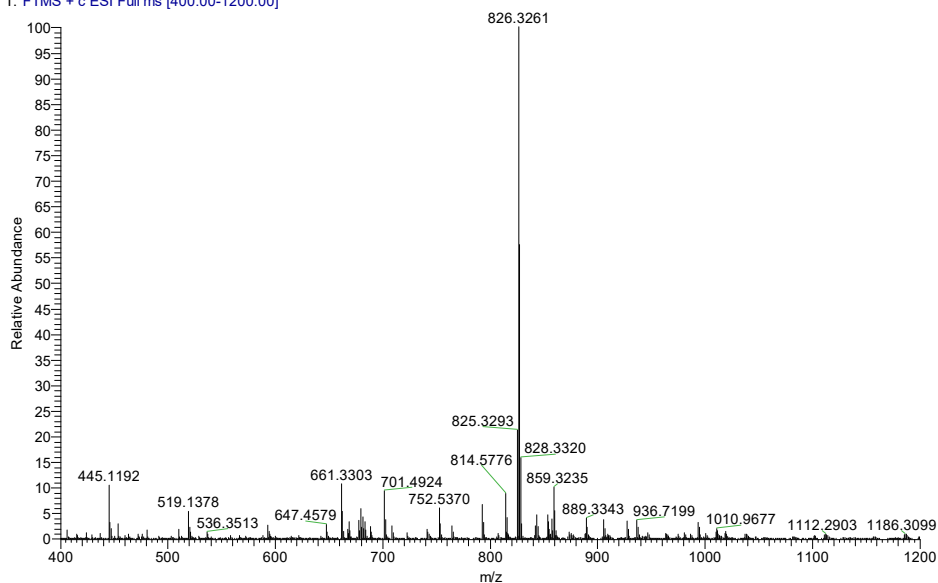

WT-1-826\_210610121705 #72-83 RT: 0.56-0.64 AV: 12 NL: 3.52E8  
T: FTMS + c ESI Full ms [400.00-1200.00]

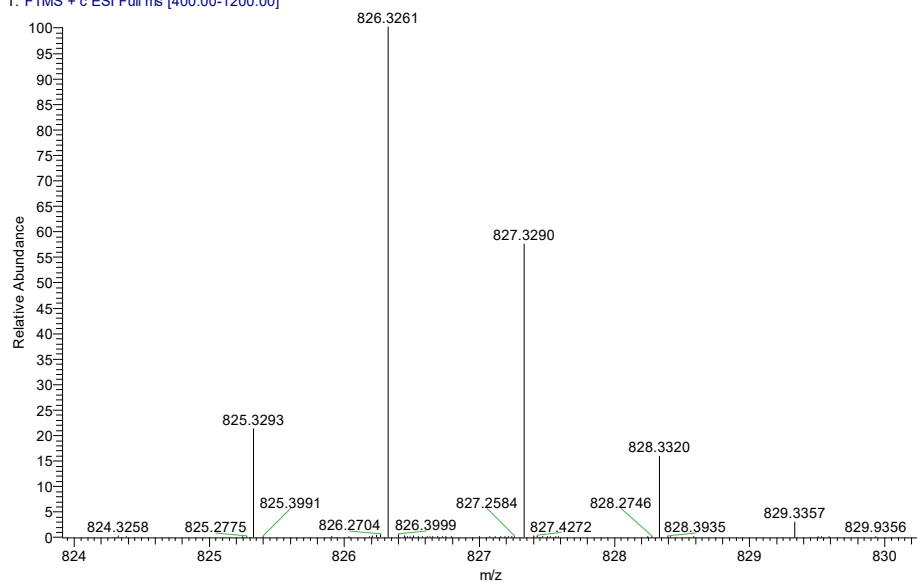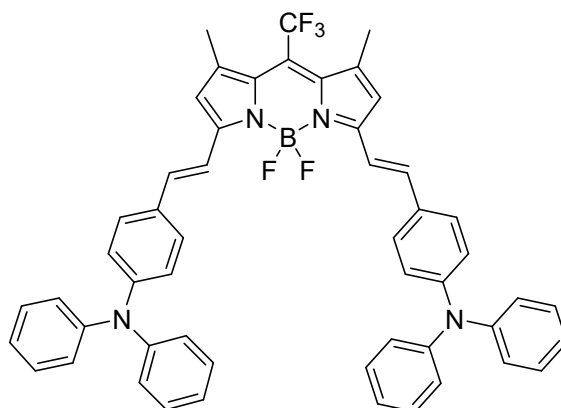

Chemical Formula:  $C_{52}H_{40}BF_5N_4$

Exact Mass: 826.3266

Molecular Weight: 826.7220

Figure S5. ESI HRMS of compound **CF<sub>3</sub>-BDP-TPA**

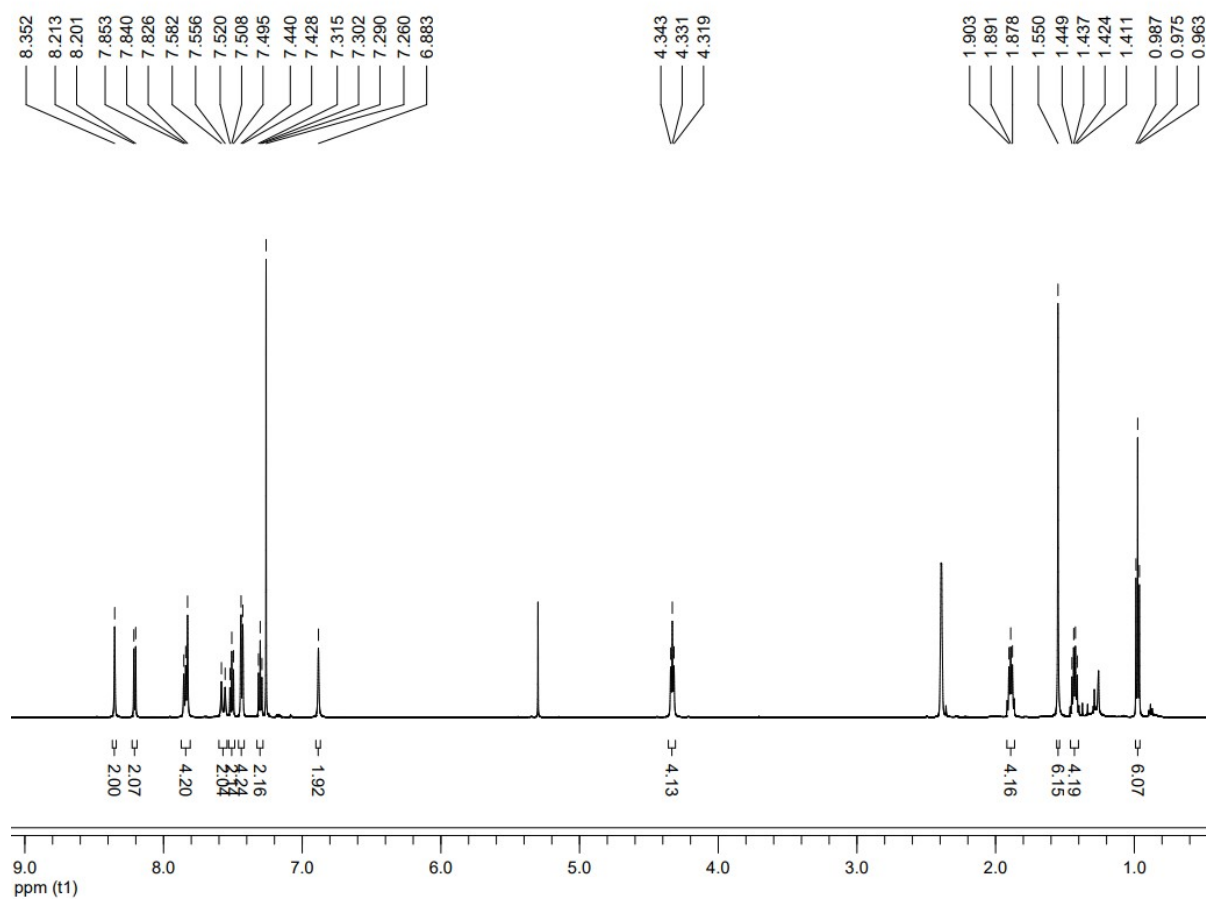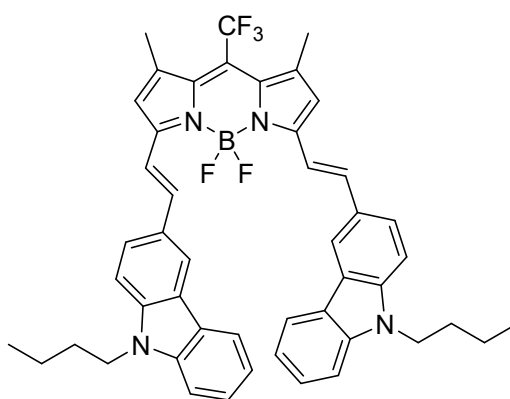

Chemical Formula: C<sub>48</sub>H<sub>44</sub>BF<sub>5</sub>N<sub>4</sub>  
 Exact Mass: 782.3579  
 Molecular Weight: 782.7100

Figure S6. <sup>1</sup>H NMR spectrum of compound **CF<sub>3</sub>-BDP-Cz** (CDCl<sub>3</sub>, 600 MHz)

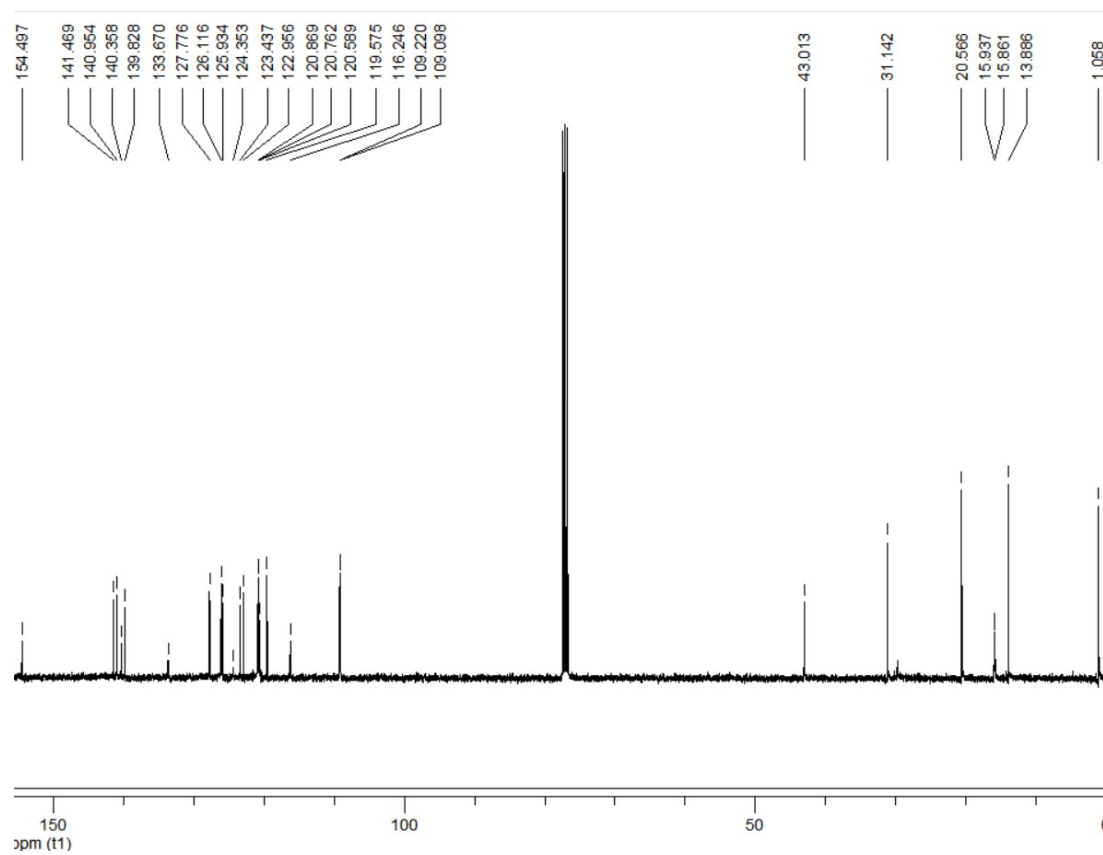

Figure S7. <sup>13</sup>C NMR spectrum of compound **CF<sub>3</sub>-BDP-Cz** (CDCl<sub>3</sub>, 400 MHz)

WT-2-782\_210610114144 #5-13 RT: 0.03-0.10 AV: 9 NL: 3.64E8  
T: FTMS + c ESI Full ms [300.00-1200.00]

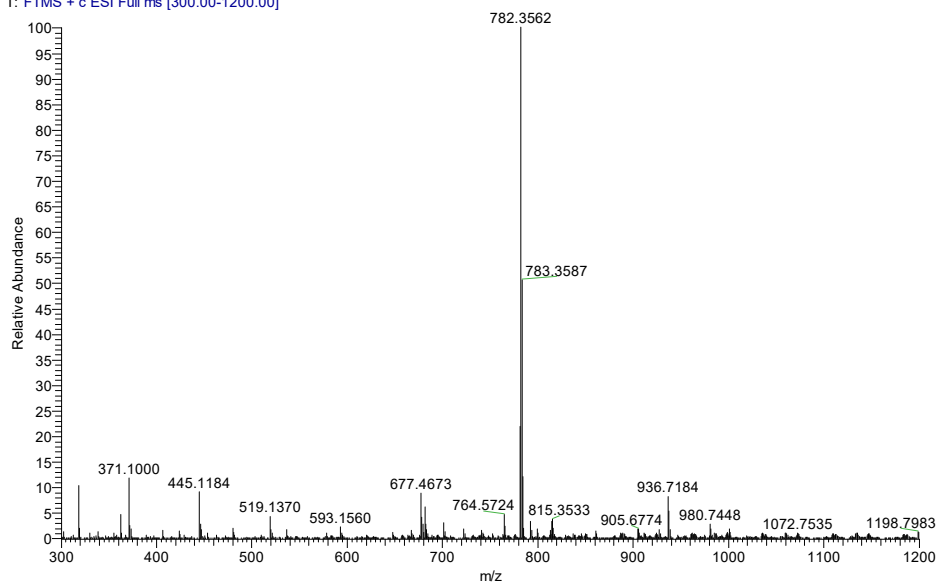

WT-2-782\_210610114144 #5-13 RT: 0.03-0.10 AV: 9 NL: 3.64E8  
T: FTMS + c ESI Full ms [300.00-1200.00]

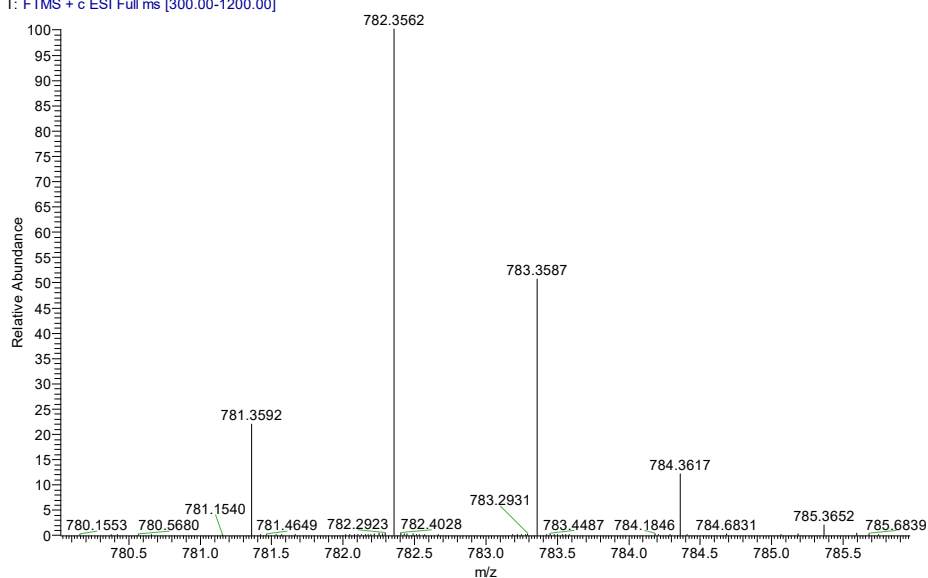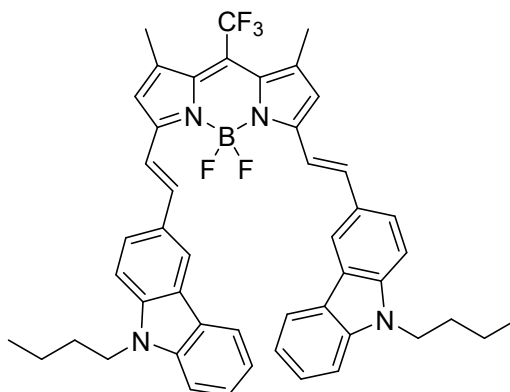

Chemical Formula:  $C_{48}H_{44}BF_5N_4$   
Exact Mass: 782.3579  
Molecular Weight: 782.7100

Figure S8. ESI HRMS of compound **CF<sub>3</sub>-BDP-Cz**

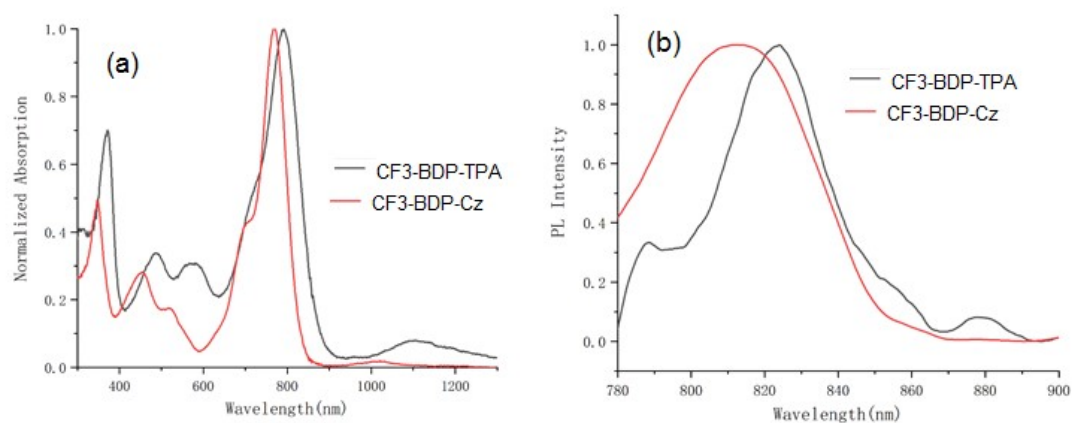

Figure S9. (a) Normalized electronic absorption spectra and (b) PL spectra of CF<sub>3</sub>-BDP-TPA and CF<sub>3</sub>-BDP-Cz in CH<sub>2</sub>Cl<sub>2</sub>

### Bonding Feature Analysis Using QTAIM and NCI-Plot Tools

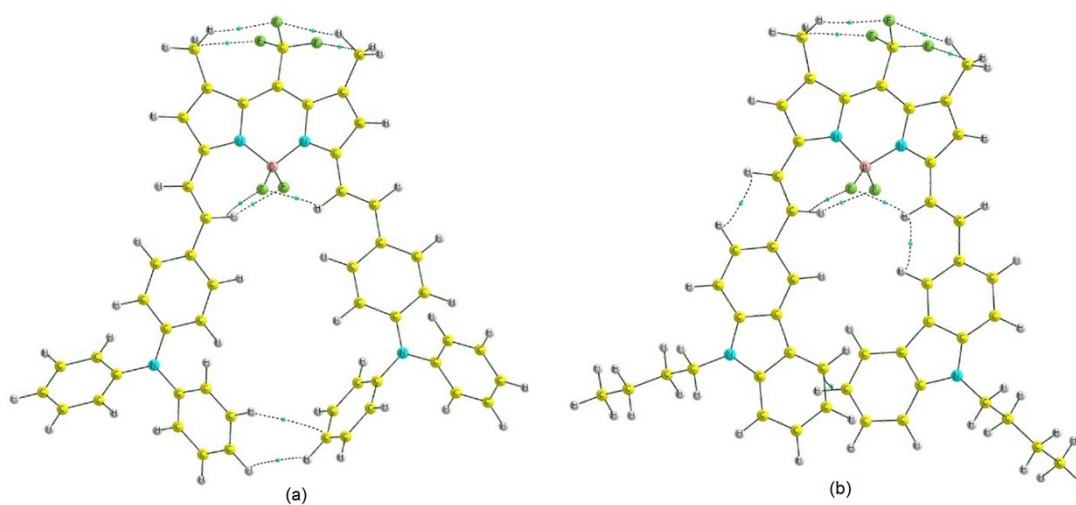

Figure S10. QTAIM Based Molecular Graph (a) CF<sub>3</sub>-BDP-TPA and (b) CF<sub>3</sub>-BDP-Cz

Table S1. Some useful and chosen extra QTAIM based topological parameters (excluding the common interactions involved therein)

| Species             | <b>CF<sub>3</sub>-BDP-TPA</b> |         | <b>CF<sub>3</sub>-BDP-Cz</b> |         |         |
|---------------------|-------------------------------|---------|------------------------------|---------|---------|
| NCI→<br>Parameters↓ | C...H                         | H...H   | C-H... $\pi$                 | H...H   | H...H   |
| BL (Å)              | 2.928                         | 2.631   | 3.085                        | 2.171   | 2.023   |
| BPL (Å)             | 3.042                         | 2.726   | 3.893                        | 2.443   | 2.248   |
| $\rho$ (au)         | 0.0052                        | 0.003   | 0.0068                       | 0.0094  | 0.0122  |
| $\nabla^2\rho$ (au) | +0.015                        | +0.0102 | +0.0218                      | +0.0372 | +0.0466 |
| V (kcal/mol)        | -1.6                          | -1.0    | -2.1                         | -3.6    | -4.6    |

Using the NCI-reduced density gradient (NCI-RDG) approach, in getting deep insights into the recognition and graphical representation of the NCIs (kind and nature) can be fabricated which can provide an inclusive illustration of the H-bonding, van der Waals (vdW) interactions, and steric repulsion in both model dyes. Usually, the localized blue lentils describe the strong attractive NCIs (i.e., H-bonding), and thin as well as delocalized green regions exemplify the vdW (extremely weak) interactions. The red isosurface interprets the steric clashes engaged within the species (e.g., see Figure S10a).

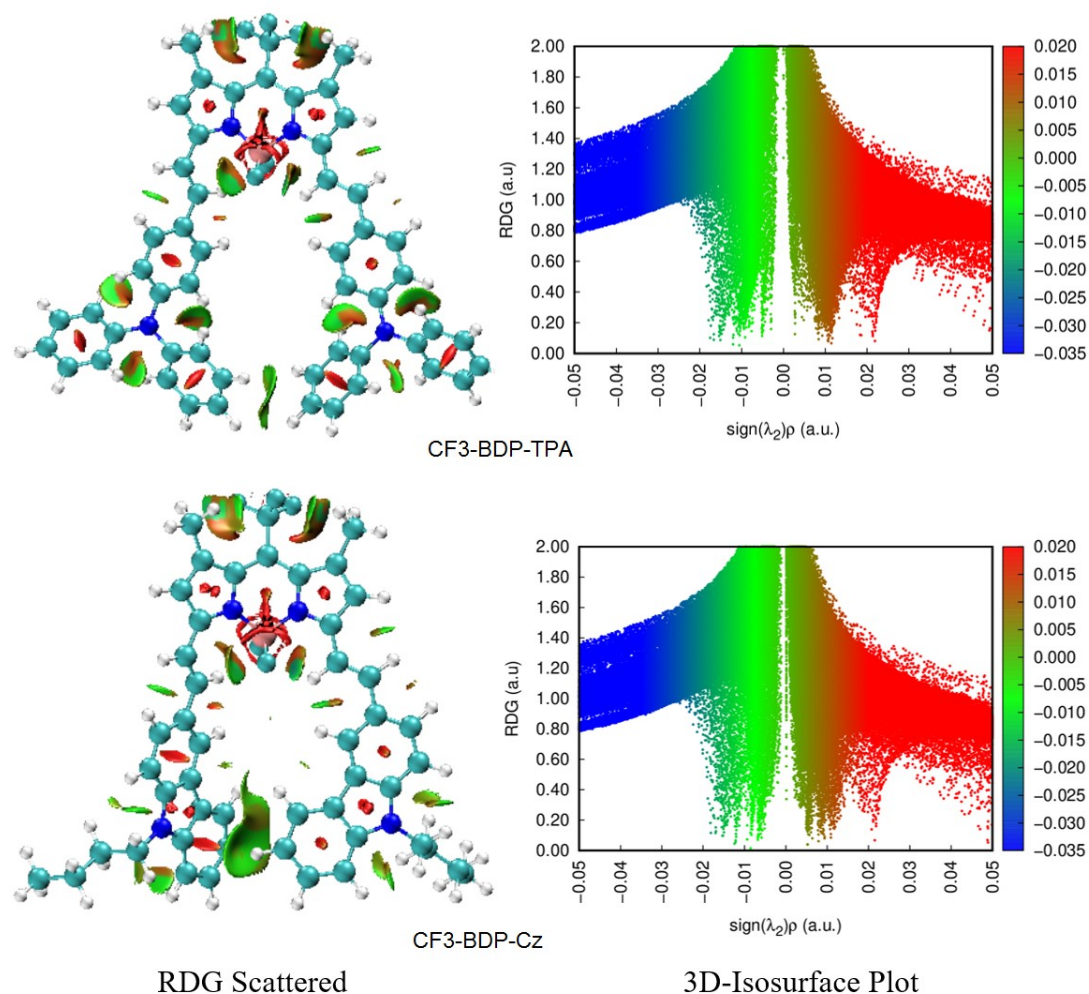

Figure S11. RDG Scattered 2D Plot and 3D iso-surface Maps

Complete information in understanding the NCI-plots is given by three color codes, red, green, and blue. The RDG iso-surface shown on the horizontal axis is 0.05 (ranging from  $-0.05$  to  $+0.05$ ). The  $\Omega(r)$  values ranging from  $-0.035$  atomic unit (au) to  $+0.02$  au on the vertical axis (Figure S11, right) show the coloured surfaces of the species on a blue–green–red scale. The detailed description of the NCI tool clarifies that the higher density values ( $\Omega(r) < 0$ ) show stronger attractive interactions, while the very low-density values ( $\Omega(r) > 0$ ) indicate the repulsive interactions. The light blue colour spikes (values ranging from  $0.015$  au to  $0.02$  au) in the 2D-scattered plot illustrate the weak H-bonding interactions like C-H $\cdots$ F interactions. The green color spikes (values ranging from  $-0.002$  au to  $-0.013$  au) in the 2D scatter plot and green color disc-shaped NCI 3D-isosurface demonstrate a variety of vdW interactions like

C $\cdots$ H and H $\cdots$ H, and C-H $\cdots$  $\pi$  interactions involved therein both species. The presence of the steric effect is evidently shown by the low-gradient spikes appearing at the positive side (+0.005 to +0.025) (see Figure S11, right). This effect, as shown by the red ellipsoid, depicts the ED depletion, which is because of the electrostatic repulsion.

### **Experimental details for fabrication of polymer solar cells**

We have fabricated the polymer solar cells (PSCs) with the conventional configuration ITO/PEDOT:PSS/PBDB-T:CF3-BDP-TPA or CF3-BDP-Cz/PFN/Al. The ITO coated glass substrates were cleaned in detergent, and subsequently ultra-sonicated in deionized water, acetone and isopropyl alcohol and dried *in vacuum* oven to remove all the traces of residues. For each molecule, the photovoltaic performance optimization process was started with identifying the donor to acceptor ratio (weight percentage, varying from 1:05 to 1:4) and after that solvent vapor annealing was applied to maximize the performance of the PSCs. The PC<sub>71</sub>BM was used as acceptor and the total concentration of D:A blend mixture was 16 mg/mL in chloroform. The devices were fabricated by depositing PEDOT:PSS as hole transport layer having thickness of 35-40 nm. The active layer was deposited by spin coating (2500 rpm, 60 s) on the top of PEDOT:PSS layer under ambient conditions. For the solvent vapor annealing (SVA), the optimized (as cast 1:1.2 D/A wt ratio) was exposed to the THF vapors for 40s. A thin layer of PFN was spin coated on the top of the active layer from the methanol solution. The aluminum (Al) electrode was deposited onto the top of PFN layer *via* thermal evaporation at the pressure less than 10<sup>-5</sup> Torr. The current-voltage characteristics of the OSCs were measured under illumination intensity of 100 mW/cm<sup>2</sup> (AM1.5 G) using a solar simulator and a Keithley 2400 source meter unit. The incident photon to current conversion efficiency (IPCE) measurements were performed using Bentham IPCE system.

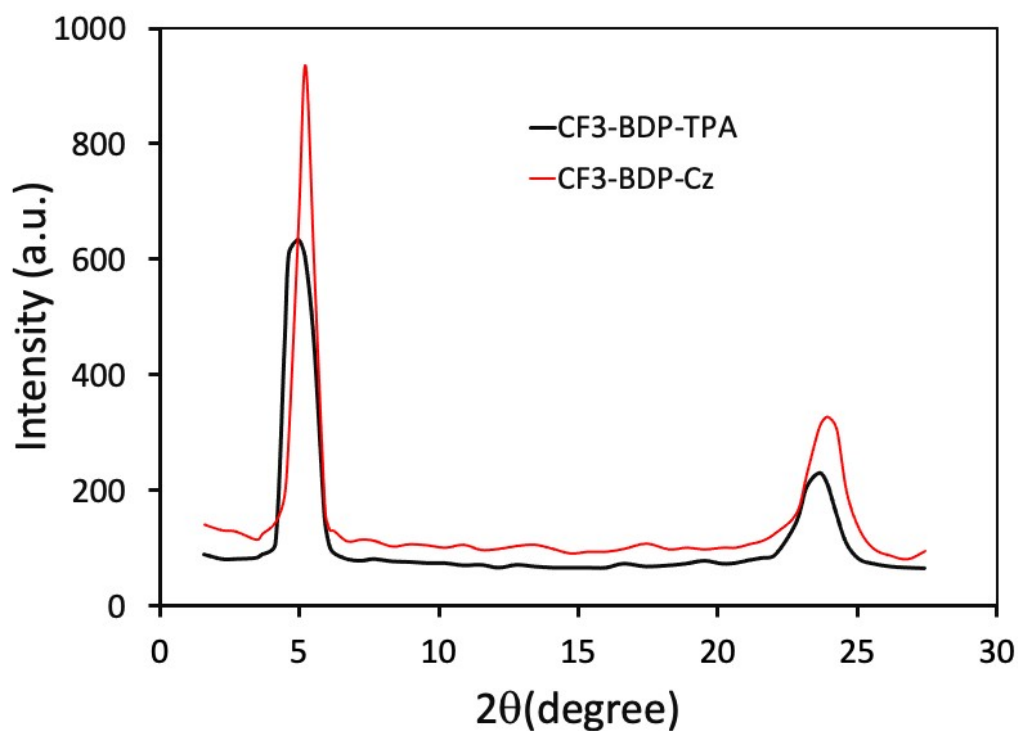

Figure S12. XRD patterns of pristine films

Table S2. Some important and chosen optimized parameters of the Compounds **CF<sub>3</sub>-BDP-TPA** and **CF<sub>3</sub>-BDP-Cz** Using the M06-2X/6-311G (d, p) Method where bond lengths are given in Å and bond angle as well as torsional angles are in degree, °)

| Species   | <b>CF<sub>3</sub>-BDP-TPA</b> | <b>CF<sub>3</sub>-BDP-Cz</b> |
|-----------|-------------------------------|------------------------------|
| C-F       | 1.345(b), 1.336(f)            | 1.345(b), 1.336(f)           |
| B-F       | 1.393(b), 1.39(f)             | 1.396 (b), 1.39 (f)          |
| C-N(1)    | 1.406(r), 1.408(l)            | 1.377(r), 1.379(l)           |
| C-N(2)    | 1.418(r), 1.417(l)            | 1.389(r), 1.385(l)           |
| C-N(3)    | 1.421(r), 1.419(l)            | 1.447(r), 1.448(l)           |
| C-C-N     | 122.4(r), 127.7(l)            | 121.4(r), 127.5(l)           |
| C-N-C(12) | 121.1(r), 120.5(l)            | 108.8(r), 108.7(l)           |
| C-N-C(23) | 118.7(r), 119.5(l)            | 125.4(r), 125.7(l)           |
| C-N-C(13) | 120.1(r), 120(l)              | 125.5(r), 125.3(l)           |
| C-C=C-C   | 179(r), 178.7(l)              | 180(r), 175.6(l)             |
